# Supplementary material
Source: publisher figshare collection journal article supplement (https://frontiersin.figshare.com/ndownloader/files/25444262)

Supplementary Figure S1. Projections employed to obtain semi-landmarks on outlines.

A) Radii design projected on each face of a centrum; B) Radii design projected on neural spines; and C) Radii design projected on transverse processes

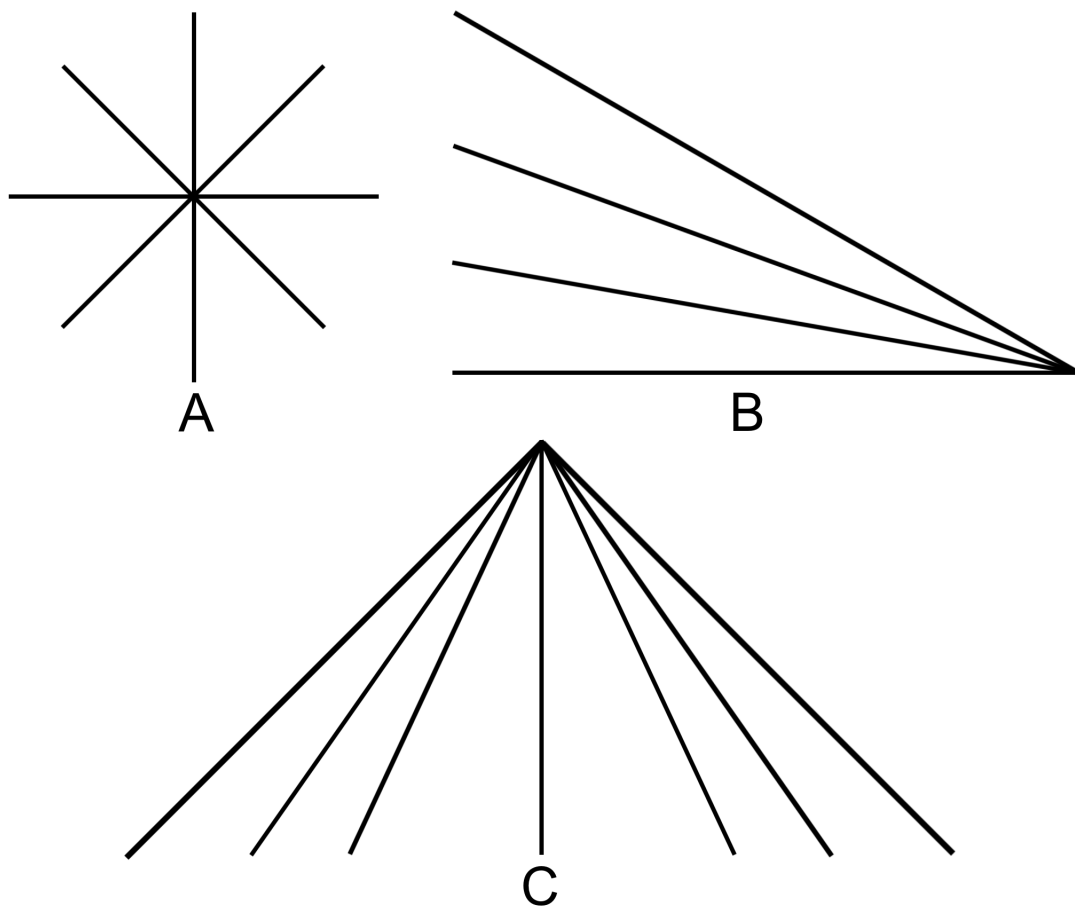

Supplement: Supplementary file 1 [file 25444262]
